# Supplementary material for: Synthesis of a Low-Cost Thiophene-Indoloquinoxaline Polymer Donor and Its Application to Polymer Solar Cells
Source: MDPI journal article supplement (doi:10.3390/polym14081554), 2022-04-11
Supplement: s1 [file s1]

# Supplementary Materials: Synthesis of a Low-Cost Thio- phene-Indoloquinoxaline Polymer Donor and Its Application to Polymer Solar Cells

Yiping Guo, Zeyang Li, Mengzhen Sha, Ping Deng, Xinyu Lin, Jun Li, Liang Zhang, Hang Yin and Hongbing Zhan

## Materials and instruments

$^1\text{H}$  NMR and  $^{13}\text{C}$  NMR were recorded on Bruker AVIII 400 MHz or 600 MHz nuclear magnetic resonance instrument in deuterated chloroform ( $\text{CDCl}_3$ ) with tetramethylsilane as the internal standard. UV-Vis spectra were measured by Perkinelmer LAMBDA 950 UV-Vis spectrophotometer. Photoluminescence (PL) spectra were taken on Horiba Jobin yvon FluoroMax-4 spectrometer. Cyclic voltammetry (CV) was tested on the Ingsens IGS1200 electrochemical analyzer, which had a three-electrode cell and was carried out in the deoxidation anhydrous acetonitrile solution of tetra-n-butylammonium-hexafluorophosphate (0.1 M) under nitrogen environment. Platinum disk electrode, platinum wire electrode and  $\text{Ag}/\text{AgNO}_3$  electrode were used as a working electrode, a counter electrode and a reference electrode, respectively. The sample films for electrochemical measurements were coated on the surface of platinum electrode. The CV curves were calibrated using the ferrocene/ferrocenium ( $\text{Fc}/\text{Fc}^+$ ) redox couple as an external standard, which was measured under same condition before and after the measurement of samples. The energy level of  $\text{Fc}/\text{Fc}^+$  was assumed at  $-4.8$  eV to vacuum. The half-wave potential of  $\text{Fc}/\text{Fc}^+$  was found to  $0.09$  V, related to the  $\text{Ag}/\text{Ag}^+$  reference electrode. The HOMO energy levels of the polymer were calculated using the equation:  $E_{\text{HOMO}} = -e(4.71 + E_{\text{ox}})$  eV, where  $E_{\text{ox}}$  is the onset oxidation potential relative to the  $\text{Ag}/\text{Ag}^+$  reference electrode. The LUMO energy levels of the polymer were calculated using the equation:  $E_{\text{LUMO}} = -e(4.71 + E_{\text{red}})$  eV, where  $E_{\text{red}}$  is the onset reduction potential relative to the  $\text{Ag}/\text{Ag}^+$  reference electrode. Thermo-gravimetric analysis (TGA) was tested on NETZSCH STA449-F5 at a heating rate of  $20$   $^{\circ}\text{C}/\text{min}$  under nitrogen atmosphere. X-ray diffraction (XRD) data was taken on a Rigaku MiniFlex 600 diffractometer with copper  $K_{\alpha}$  radiation.

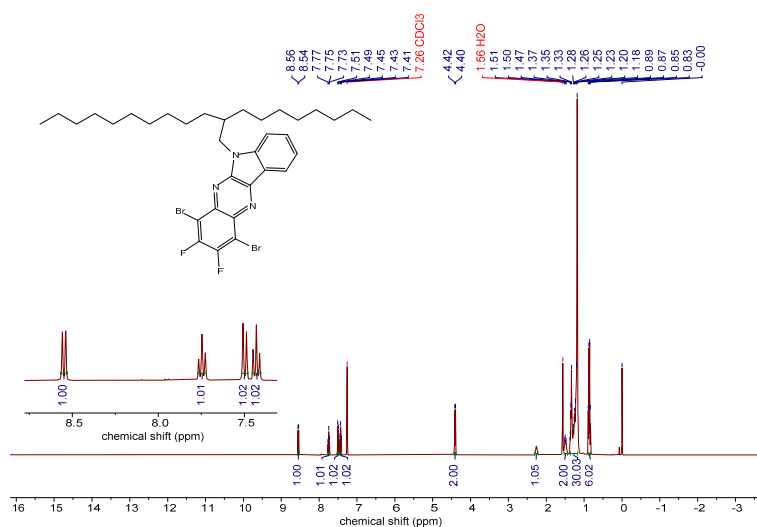

**Figure S1.**  $^1\text{H}$  NMR spectrum of 1,4-dibromo-2,3-difluoro-6-(2-octyldodecyl)-6H-indolo[2,3-b]quinoxaline (in  $\text{CDCl}_3$ ).

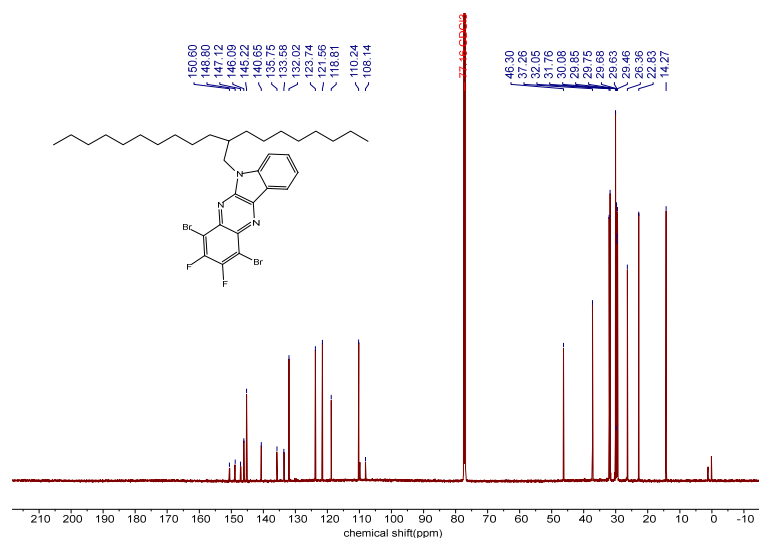

**Figure S2.** <sup>13</sup>C NMR spectrum of 1,4-dibromo-2,3-difluoro-6-(2-octyldodecyl)-6H-indolo[2,3-b]quinoxaline (in CDCl<sub>3</sub>).

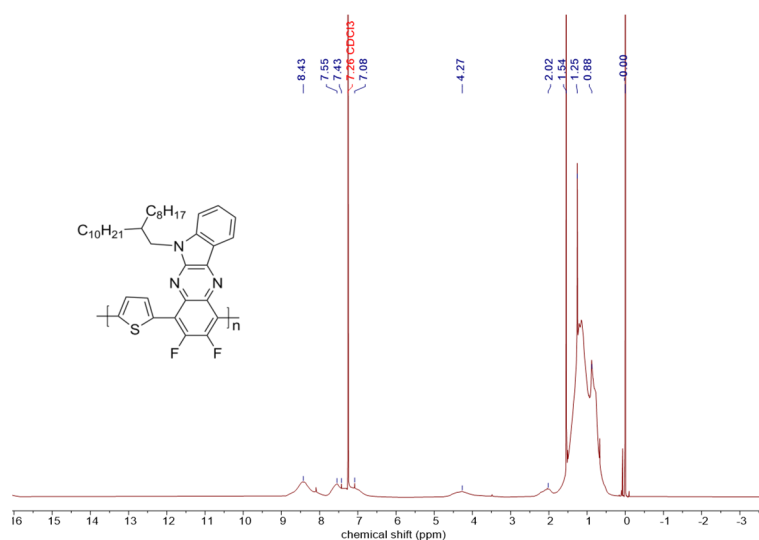

**Figure S3.** <sup>1</sup>H NMR spectrum of the polymer PIQ (in CDCl<sub>3</sub>).

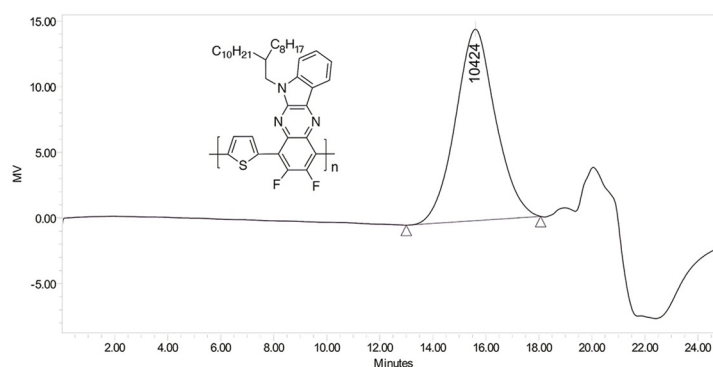

**Broad Unknown Modified Universal Peak Table**

|   | Distribution Name | Mv (Daltons) | K (dl/g) | alpha | Intrinsic Viscosity (dl/g) | Mn (Daltons) | Mw (Daltons) | MP (Daltons) | Mz (Daltons) | Mz+1 (Daltons) | Polydispersity | Mz/Mw    |
|---|-------------------|--------------|----------|-------|----------------------------|--------------|--------------|--------------|--------------|----------------|----------------|----------|
| 1 |                   |              |          |       |                            | 7108         | 14082        | 10424        | 26051        | 42611          | 1.981084       | 1.849855 |

**Figure S4.** GPC test result of the polymer PIQ (THF as eluent, 40 °C).

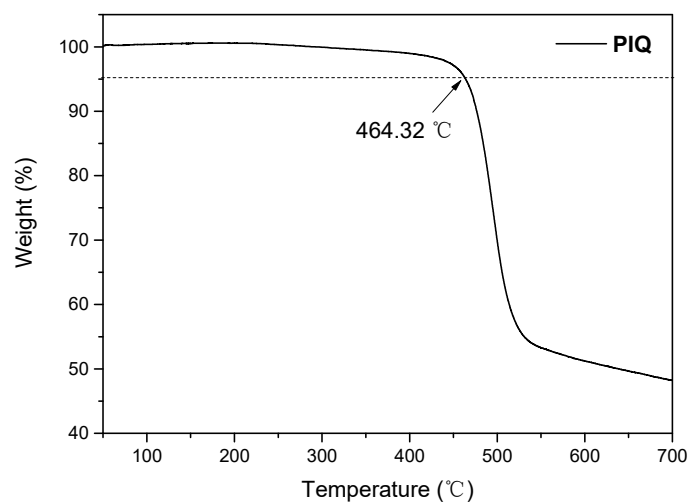

**Figure S5.** TGA curve of the polymer **PIQ**. (Heating rate: 20 °C/min; N<sub>2</sub> atmosphere).

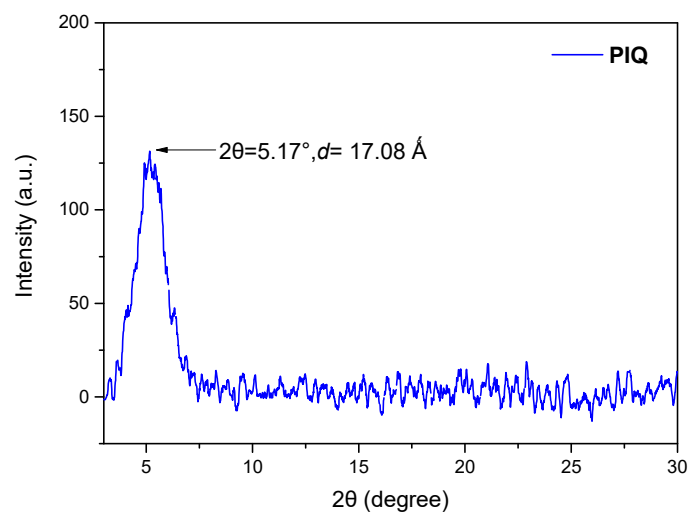

**Figure S6.** XRD pattern of the polymer **PIQ** thin film.

**Table S1.** Survey of polymer solar cells based on some representative low-cost and efficient donor polymers materials.

| Donors    | Acceptors | Anode | Hole Transport Layer | Electron Transport Layer | Cathode | PCE (%) | Reference |
|-----------|-----------|-------|----------------------|--------------------------|---------|---------|-----------|
| PTQ10     | IDIC      | Ag    | MoO <sub>3</sub>     | ZnO                      | ITO     | 12.70   | [12]      |
| PTQ7      | Y6        | ITO   | PEDOT:PSS            | PDINO                    | Al      | 5.75    | [16]      |
| PTQ8      | Y6        | ITO   | PEDOT:PSS            | PDINO                    | Al      | 0.90    | [16]      |
| PTQ9      | Y6        | ITO   | PEDOT:PSS            | PDINO                    | Al      | 10.50   | [16]      |
| PTQ10     | Y6        | Ag    | MoO <sub>3</sub>     | ZnO                      | ITO     | 15.03   | [17]      |
| P3HT      | Y6        | ITO   | PEDOT:PSS            | Ca                       | Al      | 2.41    | [18]      |
| PTOBT-Z   | ITIC      | Ag    | MoO <sub>3</sub>     | ZnO                      | ITO     | 9.04    | [19]      |
| PTOBT-Z/E | ITIC      | Ag    | MoO <sub>3</sub>     | ZnO                      | ITO     | 6.86    | [19]      |
| PTVT-T    | IT-4F     | ITO   | PEDOT:PSS            | PFN-Br                   | Al      | 11.28   | [20]      |
| PTVT-T    | eC9       | ITO   | PEDOT:PSS            | PFN-Br                   | Al      | 16.20   | [20]      |
| P4T2F-HD  | Y6-BO     | Ag    | MoO <sub>3</sub>     | ZnO                      | ITO     | 13.65   | [21]      |
| P301      | Y5        | ITO   | PEDOT:PSS            | PFN-Br                   | Al      | 2.33    | [22]      |
| P302      | Y5        | ITO   | PEDOT:PSS            | PFN-Br                   | Al      | 9.65    | [22]      |

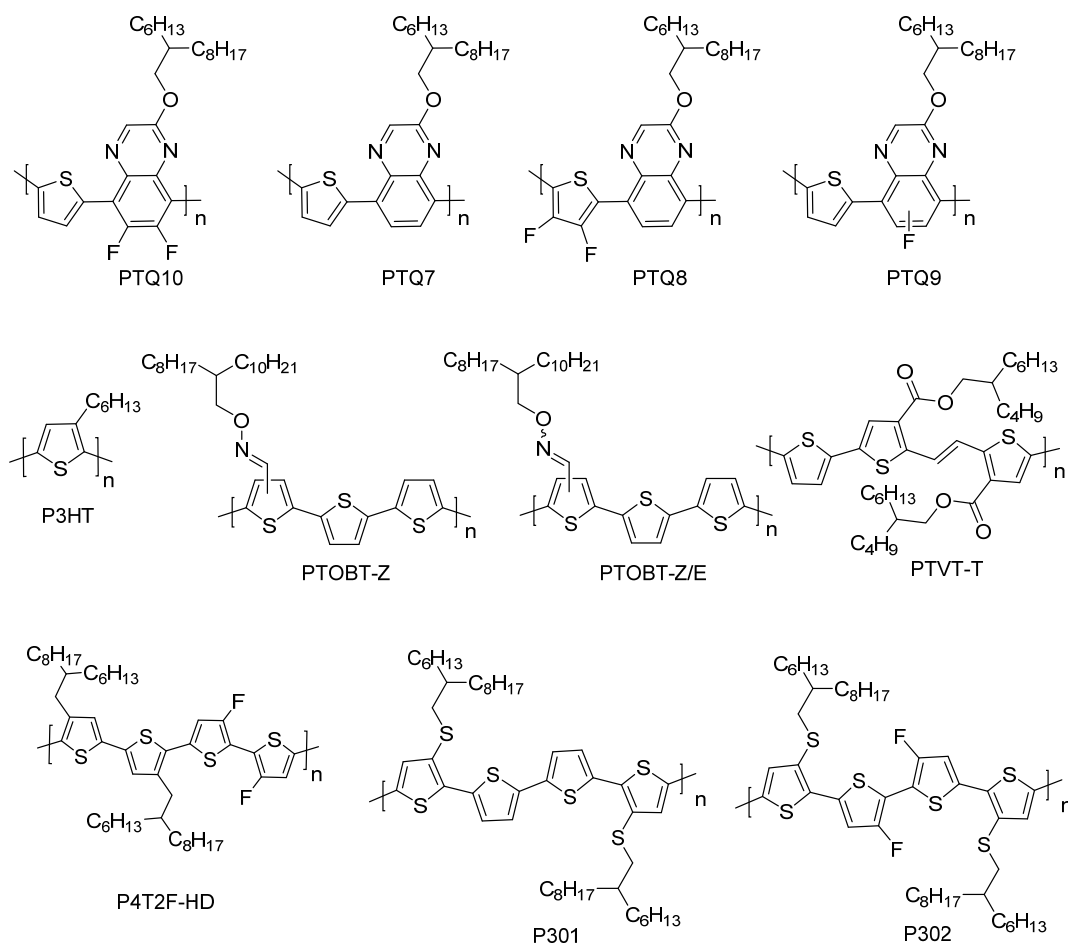

**Figure S7.** Chemical structures of polymer donors involved in **Table S1**.

**Table S2.** Survey of calculated chemical synthesis costs for **PIQ** (100 g)<sup>1</sup>.

| Path         | Material                                    | Quantity consumed | Cost (¥) | Total (¥) |
|--------------|---------------------------------------------|-------------------|----------|-----------|
| Route 1      | Indoline-2,3-dione                          | 102.7 g           | 91.4     | 41427.5   |
|              | 9-(Iodomethyl)nonadecane                    | 427.9 g           | 556.3    |           |
|              | 3,6-Dibromo-4,5-difluorobenzene-1,2-diamine | 263.2 g           | 30268    |           |
|              | thiophene                                   | 18 g              | 5        |           |
|              | n-BuLi                                      | 0.17 L            | 170      |           |
|              | trimethyltin chloride                       | 0.42 L            | 4410     |           |
|              | K <sub>2</sub> CO <sub>3</sub>              | 193.1 g           | 9.6      |           |
|              | Pd <sub>2</sub> (dba) <sub>3</sub>          | 3.7 g             | 425.5    |           |
|              | P(o-tolyl) <sub>3</sub>                     | 9.1 g             | 92.8     |           |
|              | DMF                                         | 2.9 L             | 130.5    |           |
|              | CH <sub>3</sub> COOH                        | 4.5 L             | 94.5     |           |
|              | THF                                         | 0.4 L             | 30       |           |
|              | Toluene                                     | 6.1 L             | 225.7    |           |
|              | MgSO <sub>4</sub>                           | 320 g             | 28.7     |           |
| Purification | Eluent and extraction solvent               | 216 L             | 2592     |           |
|              | SiO <sub>2</sub>                            | 53.4 kg           | 1335     |           |
|              | Methanol                                    | 15 L              | 255      |           |
|              | Petroleum ether                             | 15 L              | 120      |           |
|              | Chloroform                                  | 15 L              | 516      |           |
| other        | Calcium hydride                             | 60 g              | 26       |           |
|              | molecular sieves                            | 0.6 kg            | 45.5     |           |
| Route 2      | Indoline-2,3-dione                          | 78.1 g            | 69.5     | 24114.9   |
|              | 9-(Iodomethyl)nonadecane                    | 213.5 g           | 277.6    |           |
|              | 3,6-Dibromo-4,5-difluorobenzene-1,2-diamine | 133.5 g           | 15352.5  |           |
|              | thiophene                                   | 18 g              | 5        |           |

|              |                                    |         |       |
|--------------|------------------------------------|---------|-------|
|              | n-BuLi                             | 0.17 L  | 170   |
|              | trimethyltin chloride              | 0.42 L  | 4410  |
|              | K <sub>2</sub> CO <sub>3</sub>     | 93.7 g  | 4.7   |
|              | Pd <sub>2</sub> (dba) <sub>3</sub> | 3.7 g   | 425.5 |
|              | P(o-tolyl) <sub>3</sub>            | 9.1 g   | 92.8  |
| Solvent      | DMF                                | 1.5 L   | 67.5  |
|              | CH <sub>3</sub> COOH               | 1.4 L   | 29.4  |
|              | THF                                | 0.4 L   | 30    |
|              | Toluene                            | 6.1 L   | 225.7 |
| Purification | MgSO <sub>4</sub>                  | 320 g   | 28.7  |
|              | Eluent and extraction solvent      | 108 L   | 1296  |
|              | SiO <sub>2</sub>                   | 26.7 kg | 667.5 |
|              | Methanol                           | 15 L    | 255   |
|              | Petroleum ether                    | 15 L    | 120   |
| other        | Chloroform                         | 15 L    | 516   |
|              | Calcium hydride                    | 60 g    | 26    |
|              | molecular sieves                   | 0.6 kg  | 45.5  |

<sup>1</sup> The chemical synthesis cost was calculated according to the model reported in reference 36.

**Table S3.** Comparison of the synthetic steps and synthesis costs for donor materials.

| Compound            | Total Step | $C_g$<br>(¥ per g) <sup>1</sup> | Reference |
|---------------------|------------|---------------------------------|-----------|
| PIQ                 | 4          | 241.1                           | This work |
| PTQ10               | 3          | 259.3                           | [12,36]   |
| P3HT                | 2          | 70.1                            | [36,37]   |
| PBDB-T <sup>2</sup> | 10         | 367.2                           | [36,38]   |
| PM6 <sup>2</sup>    | 11         | 778.7                           | [36,39]   |

<sup>1</sup>  $C_g$  cost-per-gram, and unit cost converted from the calculation; <sup>2</sup> Donors commonly used in polymer solar cells, their molecular structures are shown in Fig. S8.

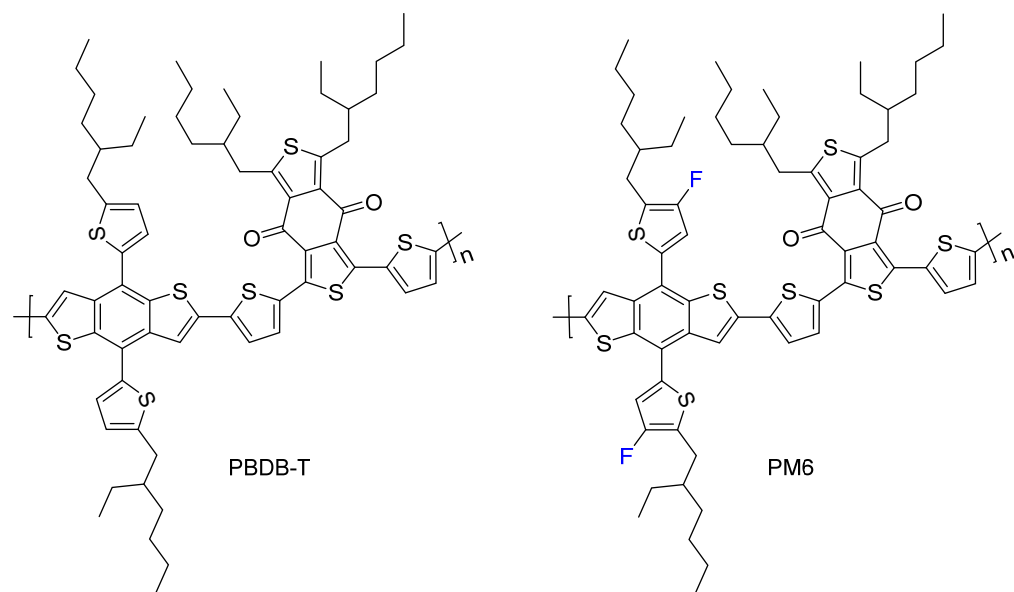

**Figure S8.** Chemical structures of PBDB-T and PM6.

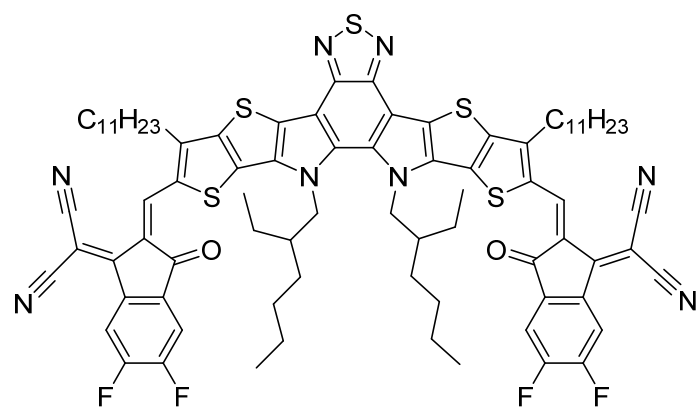

**Figure S9.** Chemical structure of Y6.
